# Supplementary material for: Highly Efficient Non-Enzymatic Glucose Sensor Based on CuO Modified Vertically-Grown ZnO Nanorods on Electrode
Source: PubMed Central journal article supplement (PMC5515932; doi:10.1038/s41598-017-06064-8), 2017-07-18
Supplement: 41598_2017_6064_MOESM1_ESM.pdf [file 41598_2017_6064_MOESM1_ESM.pdf]

## *Supplementary information*

### **Highly Efficient Non-Enzymatic Glucose Sensor Based on CuO Modified Vertically-Grown ZnO Nanorods on Electrode**

Rafiq Ahmad<sup>1</sup>, Nirmalya Tripathy<sup>2</sup>, Min-Sang Ahn<sup>1</sup>, Kiesar Sideeq Bhat<sup>1</sup>, Tahmineh Mahmoudi<sup>1</sup>, Yousheng Wang<sup>1</sup>, Jin-Young Yoo<sup>1</sup>, Dae-Wook Kwon<sup>1</sup>, Hwa-Young Yang<sup>1</sup> & Yoon-Bong Hahn<sup>1,\*</sup>

<sup>1</sup>School of Semiconductor and Chemical Engineering, Nanomaterials Processing Research Center, Chonbuk National University, 567 Baekjedaero, Deokjin-gu, Jeonju-si, Jeollabuk-do, 54896, Republic of Korea

<sup>2</sup>Department of BIN Fusion Technology, Chonbuk National University, 567 Baekjedaero, Deokjin-gu, Jeonju-si, Jeollabuk-do, 54896, Republic of Korea.

---

\* **Corresponding author.** Tel.: +82 63 2702439; Fax: +82-63-270-2360.

E-mail: [ybhahn@chonbuk.ac.kr](mailto:ybhahn@chonbuk.ac.kr) (Y.-B. Hahn)

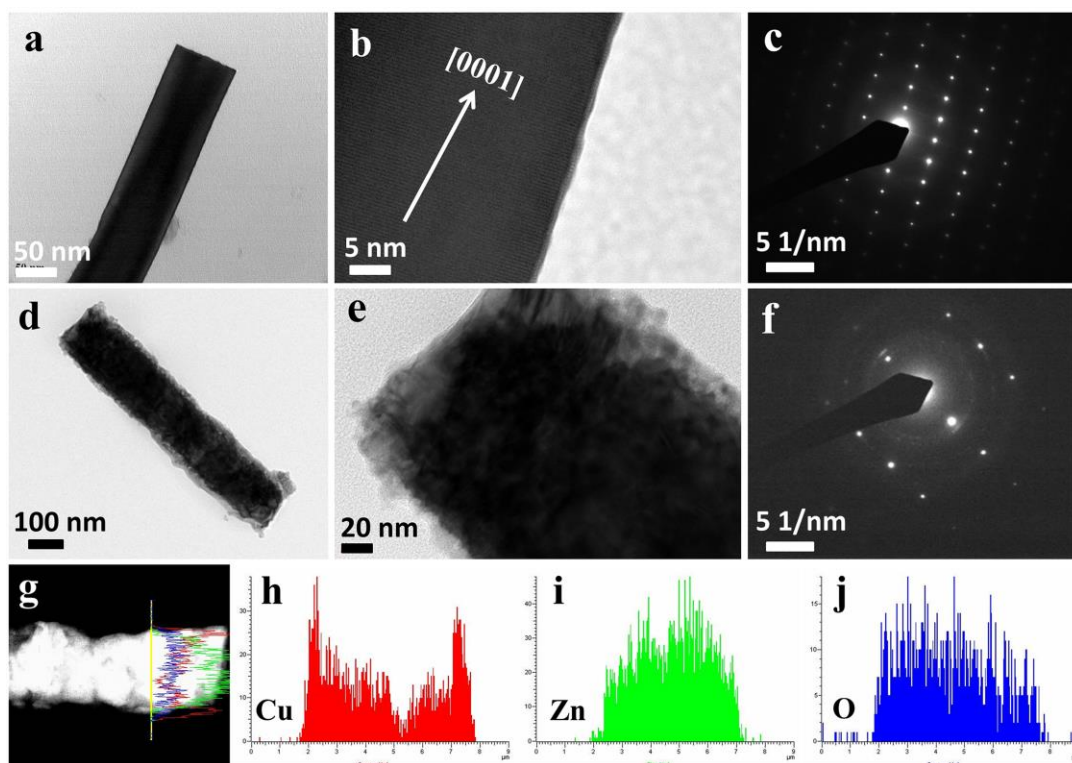

**Supplementary Figure S1.** TEM images (a and d) and HRTEM images (b and e) of ZnO NR and CuO modified ZnO NR, respectively. SAED pattern of as-synthesized ZnO NR (c) and CuO modified ZnO NR (f), and elemental mapping image of CuO modified ZnO NR (g) showing TEM-EDX-line scan profile of Cu (h), Zn (i) and O (j), respectively.

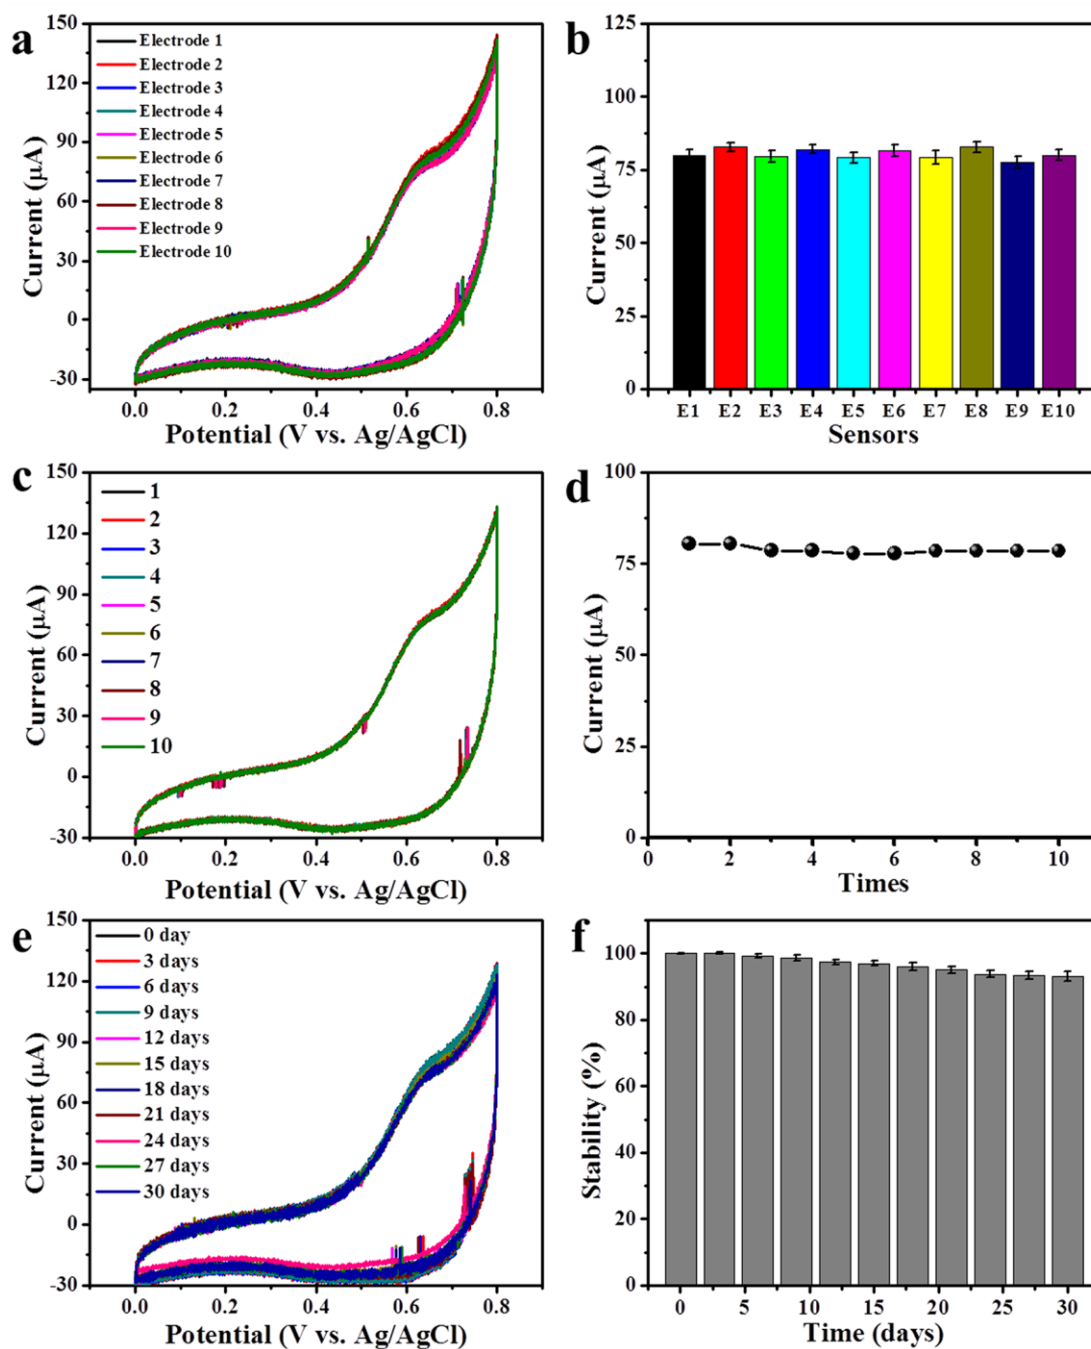

**Supplementary Figure S2.** Reproducibility (a-b), reusability (c-d), and stability (e-f) tests. All the tests were performed using CuO-ZnO NRs/FTO electrodes in 0.1 M NaOH solution containing 0.1 mM glucose at the scan rate of  $100 \text{ mV s}^{-1}$ .
